# Supplementary material for: Bacterial Outer Membrane Permeability Increase Underlies the Bactericidal Effect of Fatty Acids From Hermetia illucens (Black Soldier Fly) Larvae Fat Against Hypermucoviscous Isolates of Klebsiella pneumoniae
Source: PubMed Central journal article supplement (PMC9121012; doi:10.3389/fmicb.2022.844811), 2022-05-06
Supplement: Data_Sheet_1.pdf [file Data_Sheet_1.pdf]

| Time | (A) <i>K. pneumoniae</i> KPM9                                                                                                      |
|------|------------------------------------------------------------------------------------------------------------------------------------|
| 12h  |                                                  |
| 24h  | <p>(B) <i>K. pneumoniae</i> KPM9</p>             |
| 12h  | <p>(C) <i>K. pneumoniae</i> KPi1627</p>         |
| 24h  | <p>(D) <i>K. pneumoniae</i> KPi1627</p>        |
| 12h  | <p>(E) <i>K. pneumoniae</i> ATCC BAA-2473</p>  |
| 24h  | <p>(F) <i>K. pneumoniae</i> ATCC BAA-2473</p>                                                                                      |

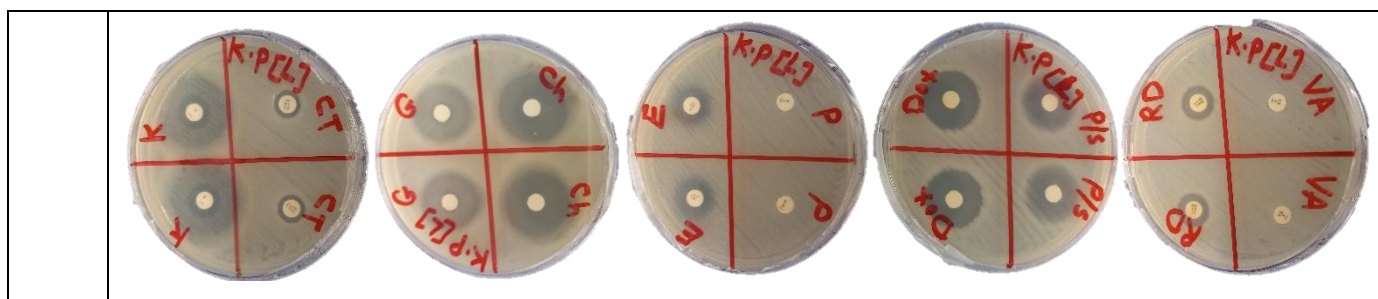

**Supplementary Figure S1.** Susceptibility of (A, B) *K. pneumoniae* KPM9, (C, D) *K. pneumoniae* KPi1627 and (E, F) *K. pneumoniae* ATCC BAA-2473 against ten groups of antibiotics determined by disk diffusion assay. All antibiotics were applied to the discs and gently pressed on the surface of the Muller Hinton agar Petri dishes with cultured bacteria strains at density  $10^8$  (CFU/mL). All discs were placed in duplicates, and the mean of resulting IZD  $\pm$ SD of three independent experiments was estimated.

**Supplementary Table S1.** MICs, MBCs, and MBC/MIC ratio of different antibiotics against human pathogenic *K. pneumoniae* strains.

| Antibiotics | <i>K. pneumoniae</i> KPi1627 |      |         | <i>K. pneumoniae</i> KPM9 |      |         | <i>K. pneumoniae</i> ATCC-2473 |             |         | MIC breakpoints ( $\mu$ g/ml) recommended by CLSI |    |           |
|-------------|------------------------------|------|---------|---------------------------|------|---------|--------------------------------|-------------|---------|---------------------------------------------------|----|-----------|
|             | MIC                          | MBC  | MBC/MIC | MIC                       | MBC  | MBC/MIC | MIC                            | MBC         | MBC/MIC | S                                                 | I  | R         |
| G           | 2.25 (S)                     | 2.25 | 1       | 1.56 (S)                  | 3.12 | 2       | $\geq 1250$ (R)                | $\geq 1250$ | -       | $\leq 4$                                          | 8  | $\geq 16$ |
| Ch          | 6.25 (S)                     | 25   | 4       | 6.25 (S)                  | 50   | 8       | 39 (R)                         | 156         | 4       | $\leq 8$                                          | 16 | $\geq 32$ |
| K           | 12.5 (S)                     | 25   | 2       | 12.5 (S)                  | 12.5 | 1       | $\geq 1250$ (R)                | $\geq 1250$ | -       | $\leq 16$                                         | 32 | 64        |
| DOX         | 1.56 (S)                     | 6.25 | 4       | 3.12 (S)                  | 12.5 | 4       | 6.25 (I)                       | 50          | 8       | $\leq 4$                                          | 8  | $\geq 16$ |

|     |               |       |   |               |       |   |              |              |   |       |     |       |
|-----|---------------|-------|---|---------------|-------|---|--------------|--------------|---|-------|-----|-------|
| P/S | 9.77<br>(S)   | 9.77  | 1 | 9.77<br>(S)   | 9.77  | 1 | ≥1250<br>(R) | ≥1250        | - | -     | -   | -     |
| CT  | ≥1250<br>(R)  | ≥1250 | - | 11.33<br>(R)  | 11.33 | 1 | 0.39<br>(S)  | 1.56         | 4 | ≤2    | -   | ≥4    |
| RD  | 78<br>(R)     | 312.5 | 4 | 39<br>(R)     | 78    | 2 | ≥1250<br>(R) | ≥1250        | - | ≤1    | 2   | ≥4    |
| E   | 625<br>(R)    | 625   | 1 | 625<br>(R)    | 1250  | 2 | 625<br>(R)   | ≥1250        | - | ≤0.5  | 1-4 | ≥8    |
| P   | 312.5<br>(R)  | 312.5 | 1 | 625<br>(R)    | 625   | 1 | ≥1250<br>(R) | ≥1250<br>(R) | - | ≤0.12 | -   | ≥0.25 |
| Amp | 156.25<br>(R) | 625   | 4 | 156.25<br>(R) | 312.5 | 2 | ≥1250<br>(R) | ≥1250        | - | ≤8    | 16  | ≥32   |
| Lev | 0.39<br>(S)   | 0.39  | 1 | 0.098<br>(S)  | 0.195 | 2 | 156<br>(R)   | 625          | 4 | ≤2    | 4   | ≥8    |
| Cip | 0.39<br>(S)   | 0.39  | 1 | 0.39<br>(S)   | 0.39  | 1 | 156<br>(R)   | 312.5        | 2 | ≤1    | 2   | ≥4    |
| Cef | 1.56<br>(S)   | 6.25  | 4 | 0.08<br>(S)   | 0.08  | 1 | 25<br>(R)    | 100          | 4 | ≤2    | -   | ≥16   |

-Values obtained were compared with those recommended by the CLSI

-Abbreviations: G, gentamicin; Ch, chloramphenicol; K, kanamycin; DOX, doxycycline; P/S, penicillin-streptomycin; CT, colistin; RD, rifampicin; E, erythromycin; VA, vancomycin; P, penicillin; Amp, Ampicillin; Lev, levofloxacin; Cip, ciprofloxacin; Cef, cefepime; R, resistant; I, intermediate; S, susceptible; (0), means no inhibition zone around the disc on the plate; (-), not determined.

**Supplementary Table S2.** Antimicrobial resistance pattern of human pathogenic *K. pneumoniae* strains ( $n = 3$ ).

| Antibiotic classes | Specific antibiotic     | Interpretation   |      |                  |      |                  |      |
|--------------------|-------------------------|------------------|------|------------------|------|------------------|------|
|                    |                         | Sensitive        |      | Intermediate     |      | Resistance       |      |
|                    |                         | <i>N</i>         | %    | <i>N</i>         | %    | <i>N</i>         | %    |
| Aminoglycosides    | Gentamycin              | 2                | 66.7 | -                | -    | 1                | 33.3 |
|                    | Kanamycin               | 2                | 66.7 | -                | -    | 1                | 33.3 |
|                    | Penicillin-streptomycin | 2                | 66.7 | -                | -    | 1                | 33.3 |
| Ansamycins         | Rifampicin              | -                | -    | -                | -    | 3                | 100  |
| Glycopeptides      | Vancomycin              | -                | -    | -                | -    | 3                | 100  |
| Macrolides         | Erythromycin            | -                | -    | -                | -    | 3                | 100  |
| Tetracyclines      | Doxycycline             | 2                | 66.7 | 1                | 33.3 | -                | -    |
| Fluroquinolones    | Ciprofloxacin           | 2                | 66.7 | -                | -    | 1                | 33.3 |
|                    | Levofloxacin            | 2                | 66.7 | -                | -    | 1                | 33.3 |
| Phenicols          | Chloramphenicol         | 2                | 66.7 | -                | -    | 1                | 33.3 |
| Penicillins        | Penicillin              | -                | -    | -                | -    | 3                | 100  |
|                    | Ampicillin              | -                | -    | -                | -    | 3                | 100  |
| Lipopeptides       | Colistin                | 1                | 33.3 |                  |      | 2                | 66.7 |
| Cephems            | Cefepime                | 2                | 66.7 | -                | -    | 1                | 33.3 |
| <i>P value</i>     |                         | <i>P</i> <0.0001 |      | <i>P</i> <0.0001 |      | <i>P</i> <0.0001 |      |

| Time | (a) <i>K. pneumoniae</i> KPi1627                                                                                                                                                                                               |
|------|--------------------------------------------------------------------------------------------------------------------------------------------------------------------------------------------------------------------------------|
| 12 h | <div style="display: flex; justify-content: space-around;"> <div style="text-align: center;"> <p>(A)</p> </div> <div style="text-align: center;"> <p>(B)</p> </div> <div style="text-align: center;"> <p>(C)</p> </div> </div> |
| 24   | (b) <i>K. pneumoniae</i> KPi1627                                                                                                                                                                                               |
|      | <div style="display: flex; justify-content: space-around;"> <div style="text-align: center;"> <p>(A)</p> </div> <div style="text-align: center;"> <p>(B)</p> </div> <div style="text-align: center;"> <p>(C)</p> </div> </div> |
| 12h  | (c) <i>K. pneumoniae</i> KPM9                                                                                                                                                                                                  |
|      | <div style="display: flex; justify-content: space-around;"> <div style="text-align: center;"> <p>(A)</p> </div> <div style="text-align: center;"> <p>(B)</p> </div> <div style="text-align: center;"> <p>(C)</p> </div> </div> |
| 24h  | (d) <i>K. pneumoniae</i> KP M9                                                                                                                                                                                                 |
|      | <div style="display: flex; justify-content: space-around;"> <div style="text-align: center;"> <p>(A)</p> </div> <div style="text-align: center;"> <p>(B)</p> </div> <div style="text-align: center;"> <p>(C)</p> </div> </div> |



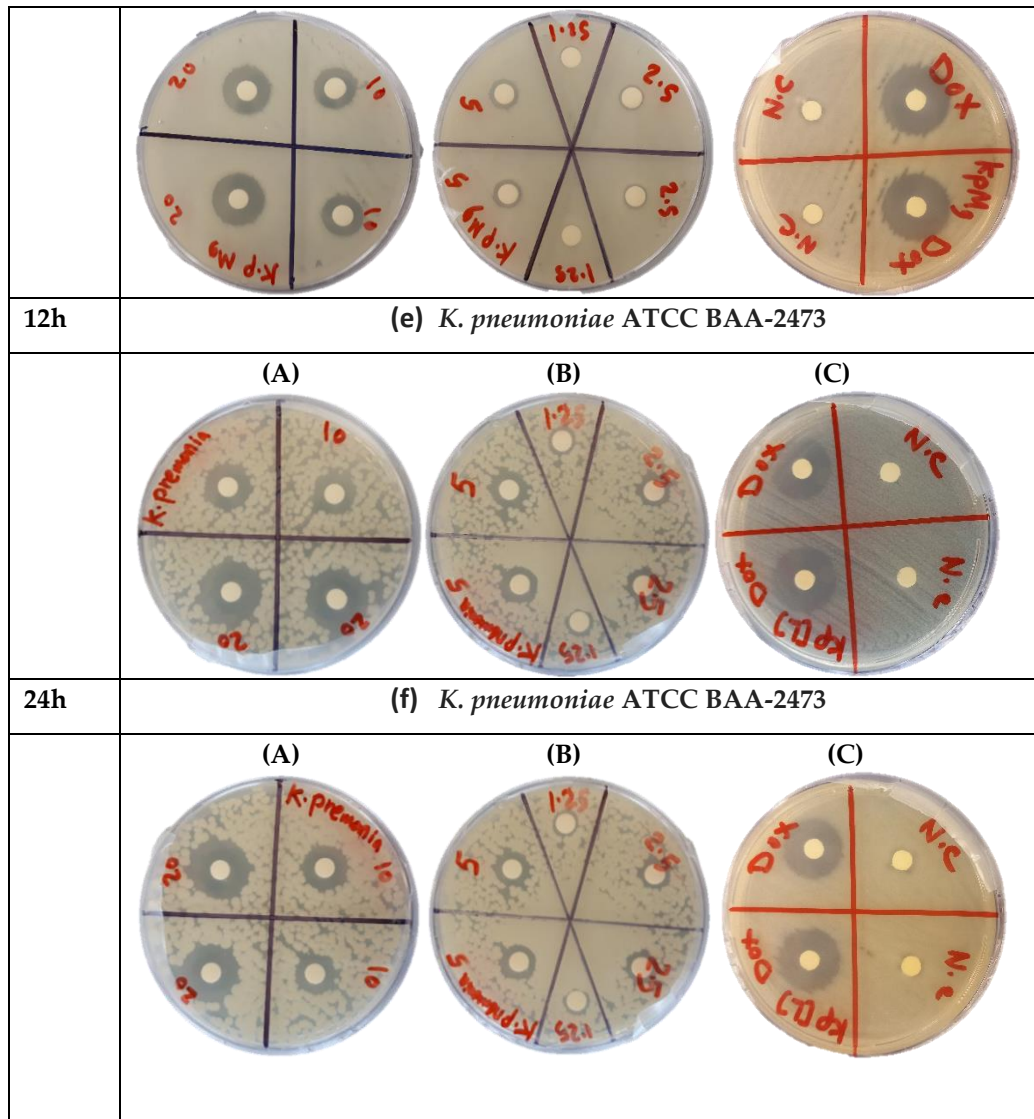

**Supplementary Figure S2.** The inhibition zone assay for tested bacteria strains. The inhibition zone diameters were measured after 12 h and 24 h of overnight incubation of the discs loaded on Petri dishes agar seeded with (a, b) *K. pneumoniae* KPi1627; (c, d) *K. pneumoniae* KPM9; and (e, f) *K. pneumoniae* ATCC BAA-2473 strains with suspension  $5 \times 10^8$  CFU/mL; (A) The discs were loaded with 50  $\mu$ L of AWME3 from larvae fat with concentrations 10 and 20 mg/mL; (B) 50  $\mu$ L of AWME3 loaded with 1.25, 2.5 and 5 mg/mL; (C) 50  $\mu$ L of DOX with concentration 600  $\mu$ g/mL (30  $\mu$ g/disk) was used as positive control and 50  $\mu$ L of pure AWM extracting reagent was used as a negative control (N.C). All samples were loaded in duplicates.

**Supplementary Table S3.** GC-MS analysis and identification of the major compounds in AWME3 of *H. illucens* larvae fat.

| Common name |                   | C: D | CAS       | Content % | RT     | Structure                                                                             |
|-------------|-------------------|------|-----------|-----------|--------|---------------------------------------------------------------------------------------|
| SFAs        | Palmitic acid     | 16:0 | 57-10-3   | 21.76     | 15.286 | 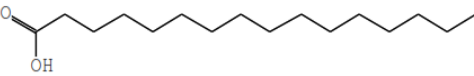   |
|             | Lauric acid       | 12:0 | 143-07-7  | 17.66     | 12.331 |    |
|             | Myristic acid     | 14:0 | 544-63-8  | 5.27      | 14.058 |    |
|             | Stearic acid      | 18:0 | 57-11-4   | 5.82      | 16.439 |    |
|             | Arachidic acid    | 20:0 | 506-30-9  | 0.31      | 17.345 |  |
|             | Capric acid       | 10:0 | 334-48-5  | 0.3       | 10.403 |  |
|             | Pentadecylic acid | 15:0 | 1002-84-2 | 0.2       | 14.753 |  |
| USFAs       | cis-Oleic acid    | 18:1 | 112-80-1  | 26.28     | 16.35  |  |
|             | Palmitoleic acid  | 16:1 | 2091-29-4 | 3.15      | 15.286 |  |

## Supplementary Material

|                 |                                                         |      |           |      |        |                                                                                       |
|-----------------|---------------------------------------------------------|------|-----------|------|--------|---------------------------------------------------------------------------------------|
|                 | Linoleic acid                                           | 18:2 | 60-33-3   | 0.21 | 16.723 | 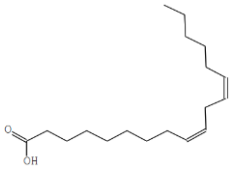   |
| FAs Derivatives | Glycerol)                                               | -    | 56-81-5   | 7.87 | 6.808  |    |
|                 | Hydroxyacetone                                          | -    | 116-09-6  | 0.11 | 3.798  |    |
|                 | Glycerol alpha-monochlorohydrin                         | -    | 96-24-2   | 0.85 | 5.928  |    |
|                 | Octylbenzene                                            | -    | 2189-60-8 | 0.11 | 11.552 |    |
|                 | Levogluconan                                            | -    | 498-07-7  | 0.14 | 11.84  |   |
|                 | Vinyl laurate                                           | -    | 146-71-6  | 0.27 | 14.683 |  |
|                 | 3-Cyclopentylpropionic acid, 2-dimethylaminoethyl ester | -    | 0-00-0    | 0.64 | 14.936 |  |
|                 | Palmitic acid methyl ester                              | -    | 112-39-0  | 0.23 | 15.187 |  |
|                 | Lauric acid chloride                                    | -    | 112-16-3  | 0.97 | 15.55  |  |



|                                           |   |            |      |        |                                                                                       |
|-------------------------------------------|---|------------|------|--------|---------------------------------------------------------------------------------------|
| Cholesterol, chloroformate                | - | 7144-08-3  | 0.21 | 15.761 | 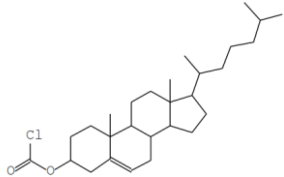   |
| 9,12-Hexadecadienoic acid, methyl ester   | - | 2462-80-8  | 0.25 | 16.542 |    |
| 2-methyl-undecanal                        | - | 110-41-8   | 0.86 | 17.004 |    |
| Octanoic acid, 2-dimethylaminoethyl ester | - | 0-00-0     | 0.23 | 17.82  |    |
| cis-9-Hexadecenal                         | - | 56219-04-6 | 0.13 | 17.901 |    |
| 2-Palmitoylglycerol                       | - | 23470-00-0 | 0.49 | 18.101 |   |
| Stearamide                                | - | 124-26-5   | 0.46 | 18.55  |  |
| Oleoyl chloride                           | - | 112-77-6   | 1.46 | 19.01  |  |
| Trielaidin                                | - | 537-39-3   | 0.61 | 19.163 |  |
| 2,3-Diacetoxypropyl stearate              | - | 56846-96-9 | 0.44 | 20.3   |  |
| Cholesta-3,5-Diene                        | - | 747-90-0   | 0.36 | 21.136 |  |

## Supplementary Material

|  |                                                          |   |            |      |        |                                                                                     |
|--|----------------------------------------------------------|---|------------|------|--------|-------------------------------------------------------------------------------------|
|  | 2,4-Dodecadienal,<br>(E,E)-                              | - | 56219-04-6 | 0.13 | 13.923 | 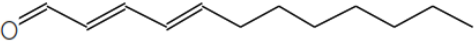 |
|  | 2-Monolaurin                                             | - | 1678-45-1  | 1.08 | 16.021 |  |
|  | Oxiraneundecanoic acid, 3-pentyl-,<br>methyl ester, cis- | - | 38520-30-8 | 1.14 | 16.137 |  |

CAS: Chemical abstract service

RT: Retention time

C: D, where C is the number

of carbon atoms and D is the number of double bonds in the carbon chain.
